# Supplementary material for: Sn-Decorated red P entangled in CNTs as anodes for advanced lithium ion batteries
Source: Royal Society of Chemistry journal article supplement (doi:10.1039/d0dt01672a), 2020-01-01
Supplement: d0dt01672a1.pdf [file d0dt01672a1.pdf]

## Supporting Information

# Sn-decorated Red P Entangled in CNTs as Anode for Advanced Lithium Ion Batteries

*Li Sun, \* Yuanxing Zhang, Yi Gong, Haochen Si, Yan Shi, Kaifeng Fan, Chao Sun, Yihe Zhang\**

*Beijing Key Laboratory of Materials Utilization of Nonmetallic Minerals and Solid Wastes, National Laboratory of Mineral Materials, School of Materials Science and Technology, China University of Geosciences, Beijing, 100083, PR China*

*\*E-mail: sunli@cugb.edu.cn, zyh@cugb.edu.cn*

### Supplementary Figures

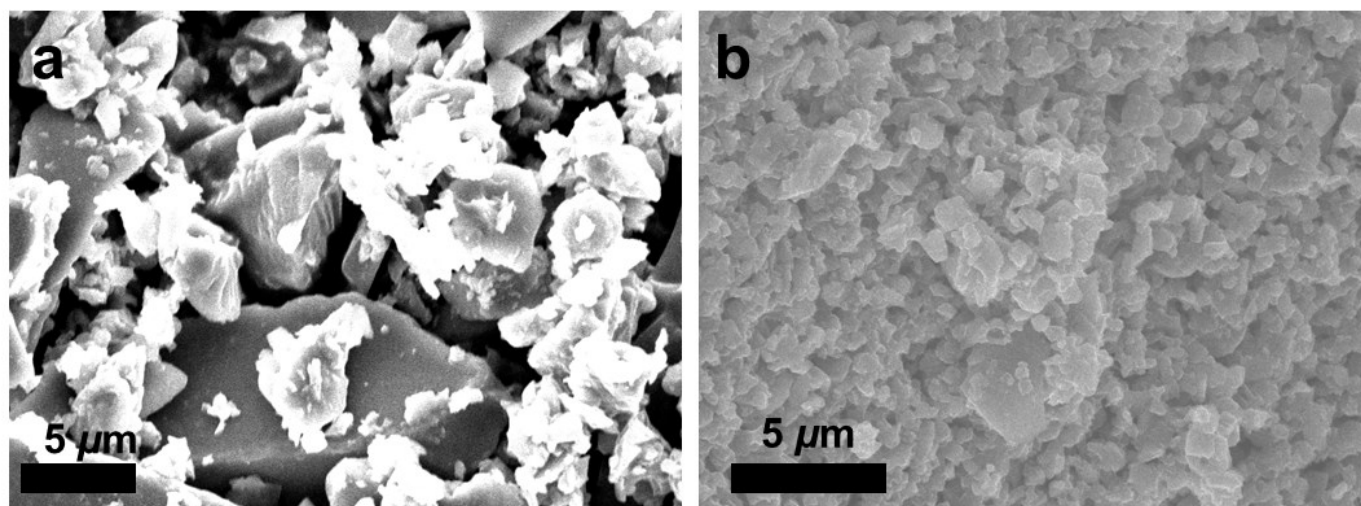

**Fig. S1** SEM images of (a) commercial red P and (b) pretreated red P.

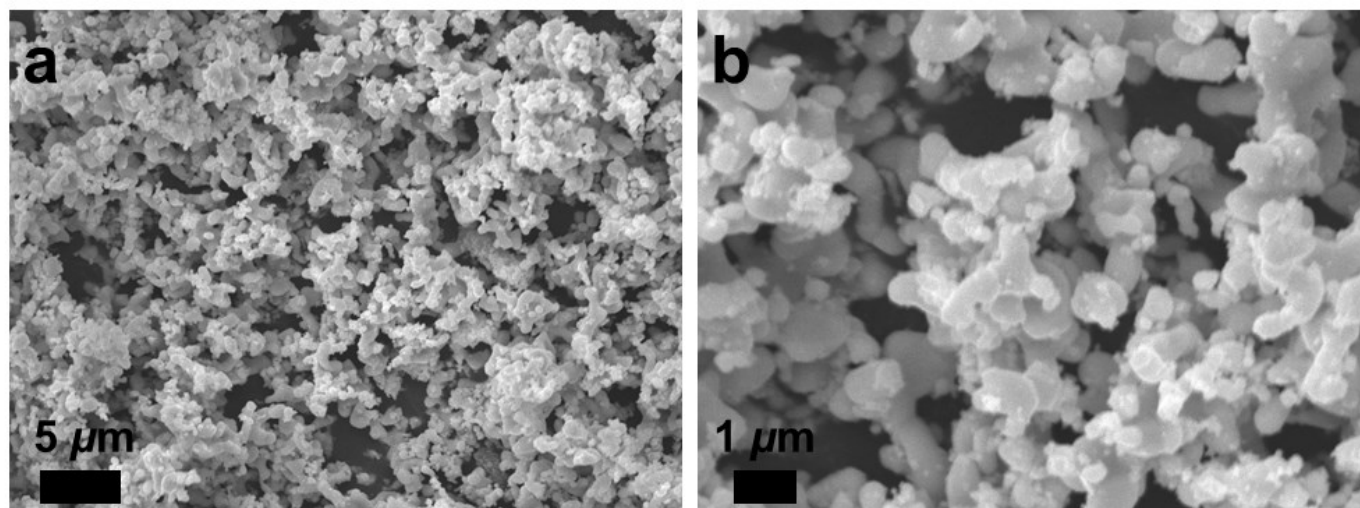

**Fig. S2** (a) Low magnification and (b) high magnification SEM images of Sn.

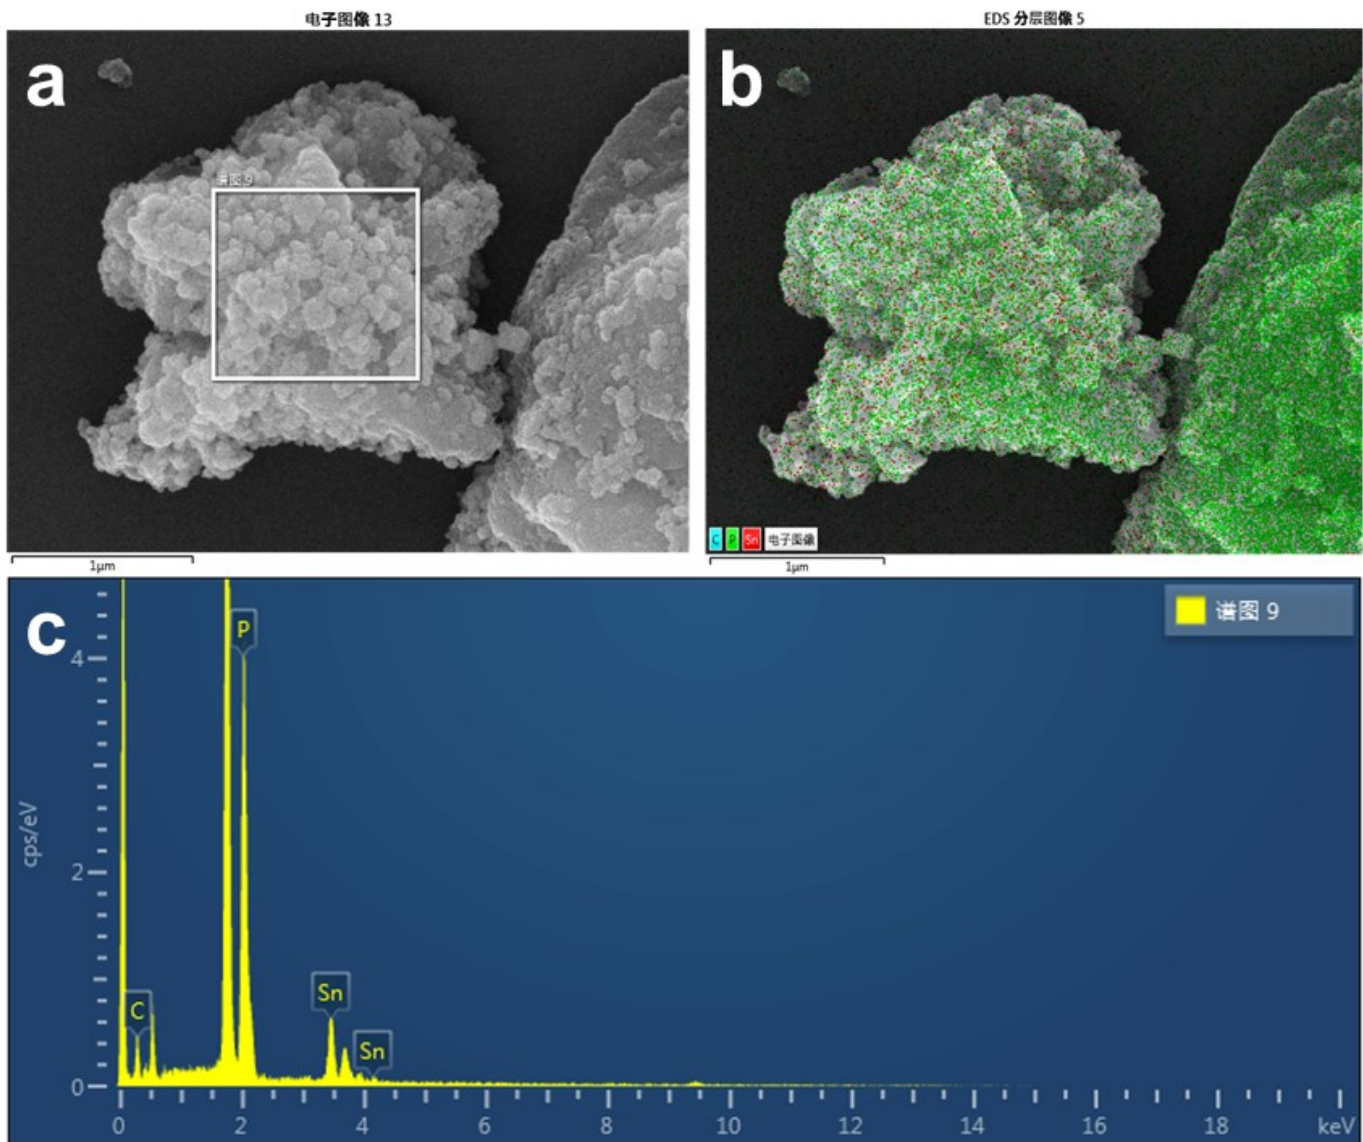

Fig. S3 (a) SEM image, corresponding (b) EDX maps and (c) EDX spectrum of P@Sn.

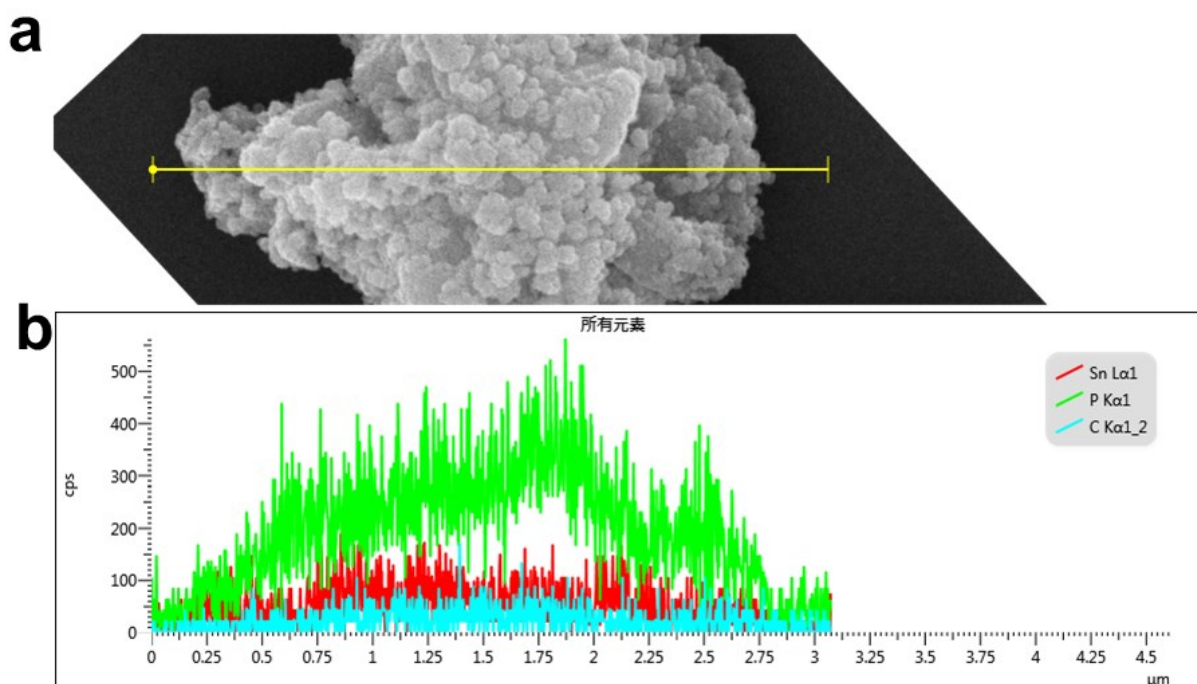

Fig. S4 (a) SEM image and corresponding (b) EDX linear scan of P@Sn.

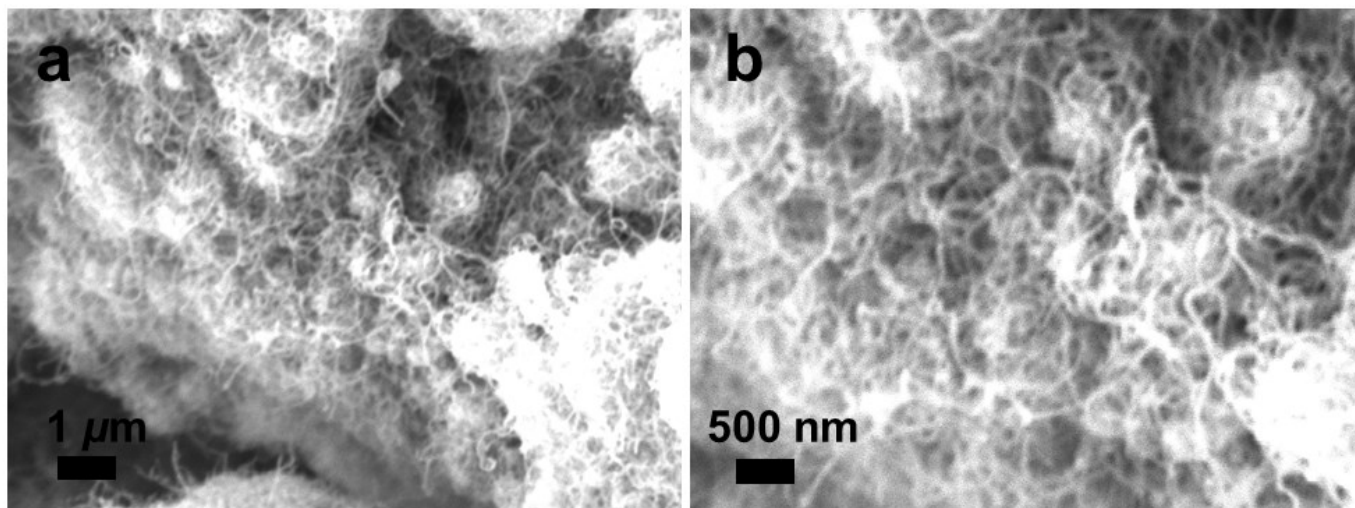

**Fig. S5** (a) Low magnification and (b) high magnification SEM images of CNTs (XFNANO, XFM19).

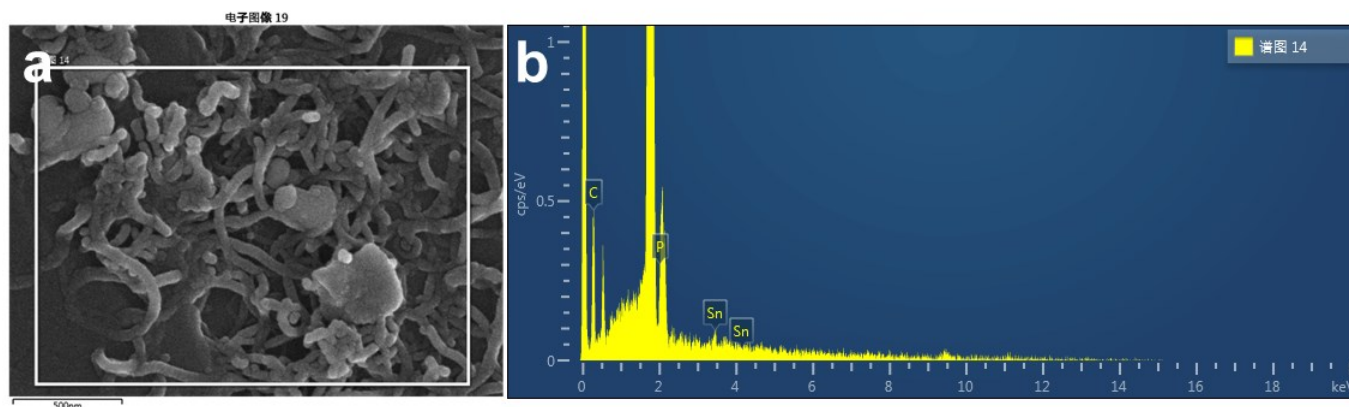

**Fig. S6** (a) SEM image and (b) corresponding EDX spectrum of P@Sn@CNT.

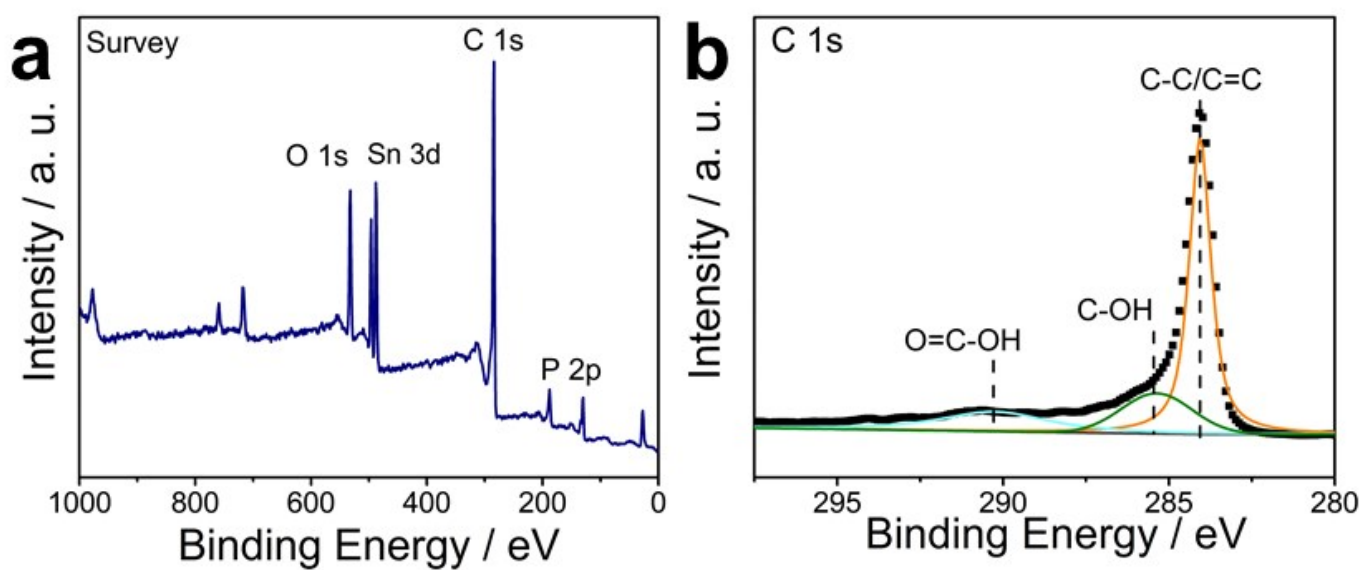

**Fig. S7** XPS (a) survey spectrum and (b) high-resolution C1s spectrum of P@Sn@CNT.

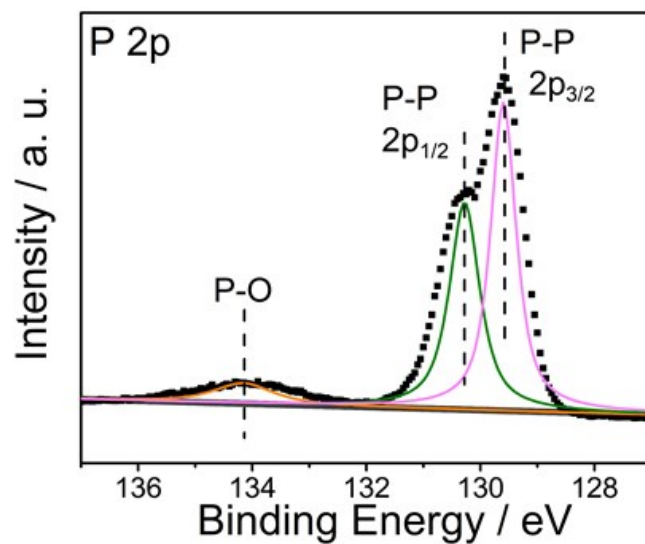

**Fig. S8** XPS high-resolution P2p spectrum of red P.

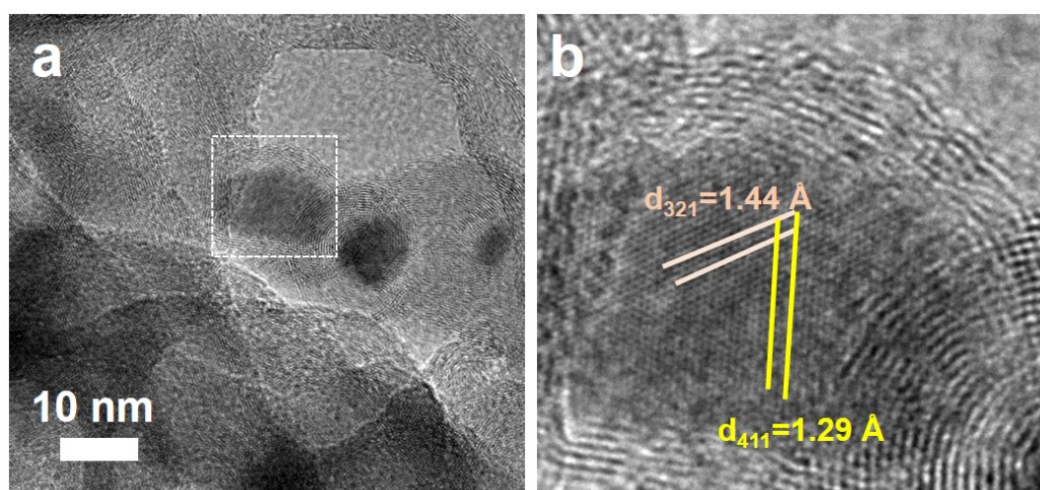

**Fig. S9** (a, b) HRTEM image of P@Sn@CNT. (b) shows the enlarged image of the dash-square in (a).

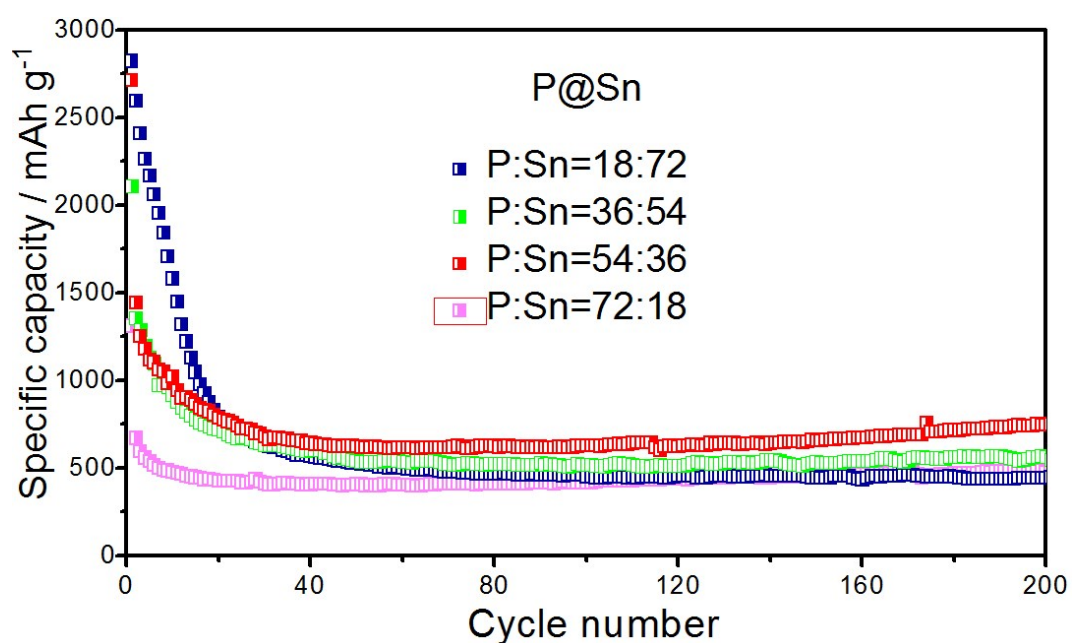

**Fig. S10** Cycle performance of P@Sn at 0.2 A g<sup>-1</sup> with different P/Sn mass ratios.

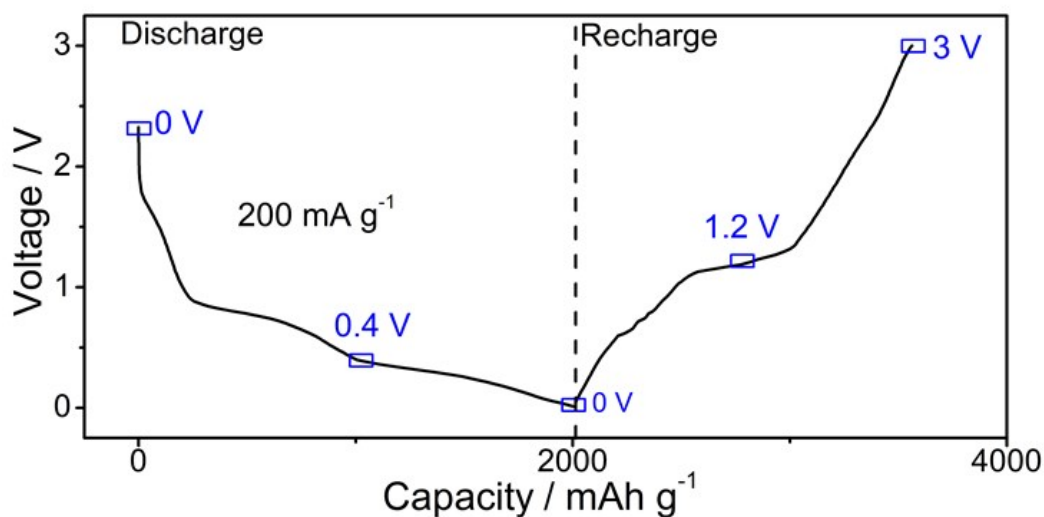

**Fig. S11** Selected voltage points in the discharge-charge curve of P@Sn@CNT in the 1<sup>st</sup> cycle.

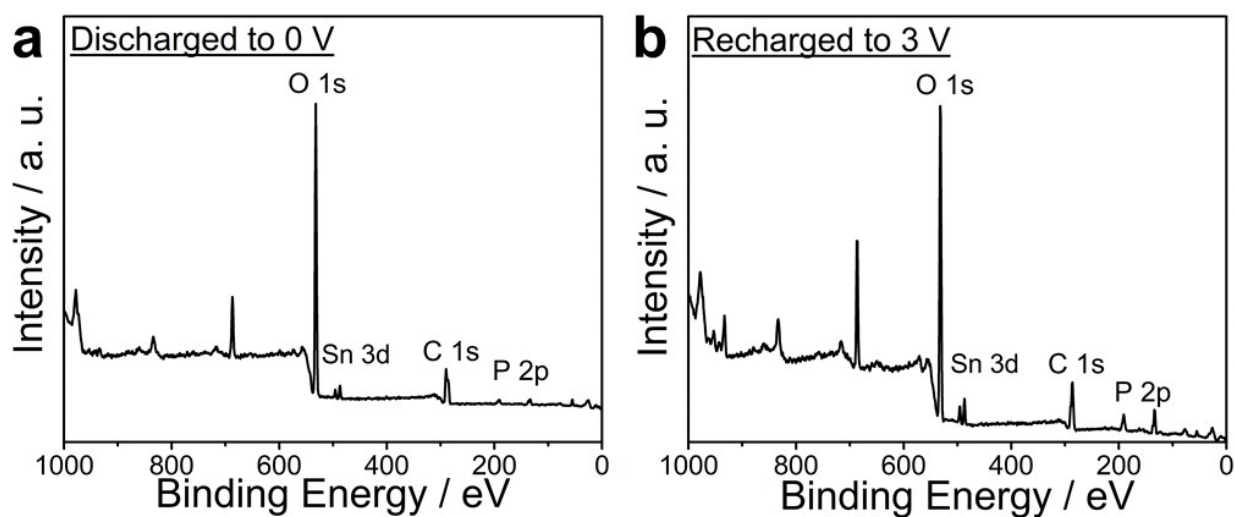

**Fig. S12** XPS survey spectrum of the P@Sn@CNT electrode during the 1<sup>st</sup> cycle: (a) discharged to 0 V and (b) recharged to 3 V.

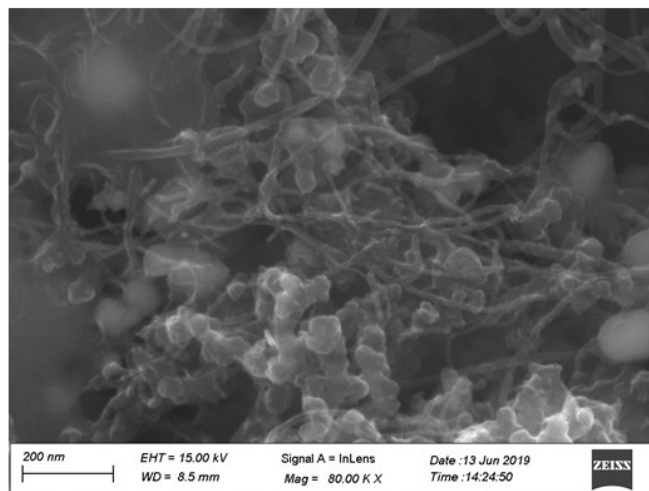

**Fig. S13** SEM image of the fresh P@Sn@CNT electrode.

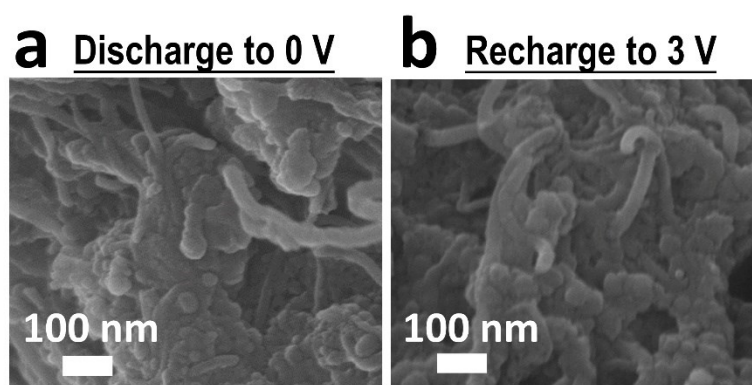

**Fig. S14** SEM image of the P@Sn@CNT electrode during the 1<sup>st</sup> cycle: (a) discharged to 0 V and (b) recharged to 3 V.

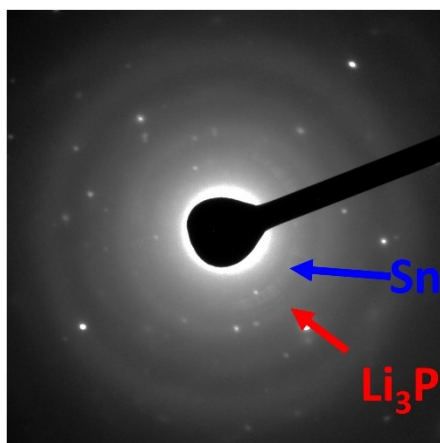

**Fig. S15** SAED pattern of the P@Sn@CNT electrode after the 1<sup>st</sup> discharge to 0 V.

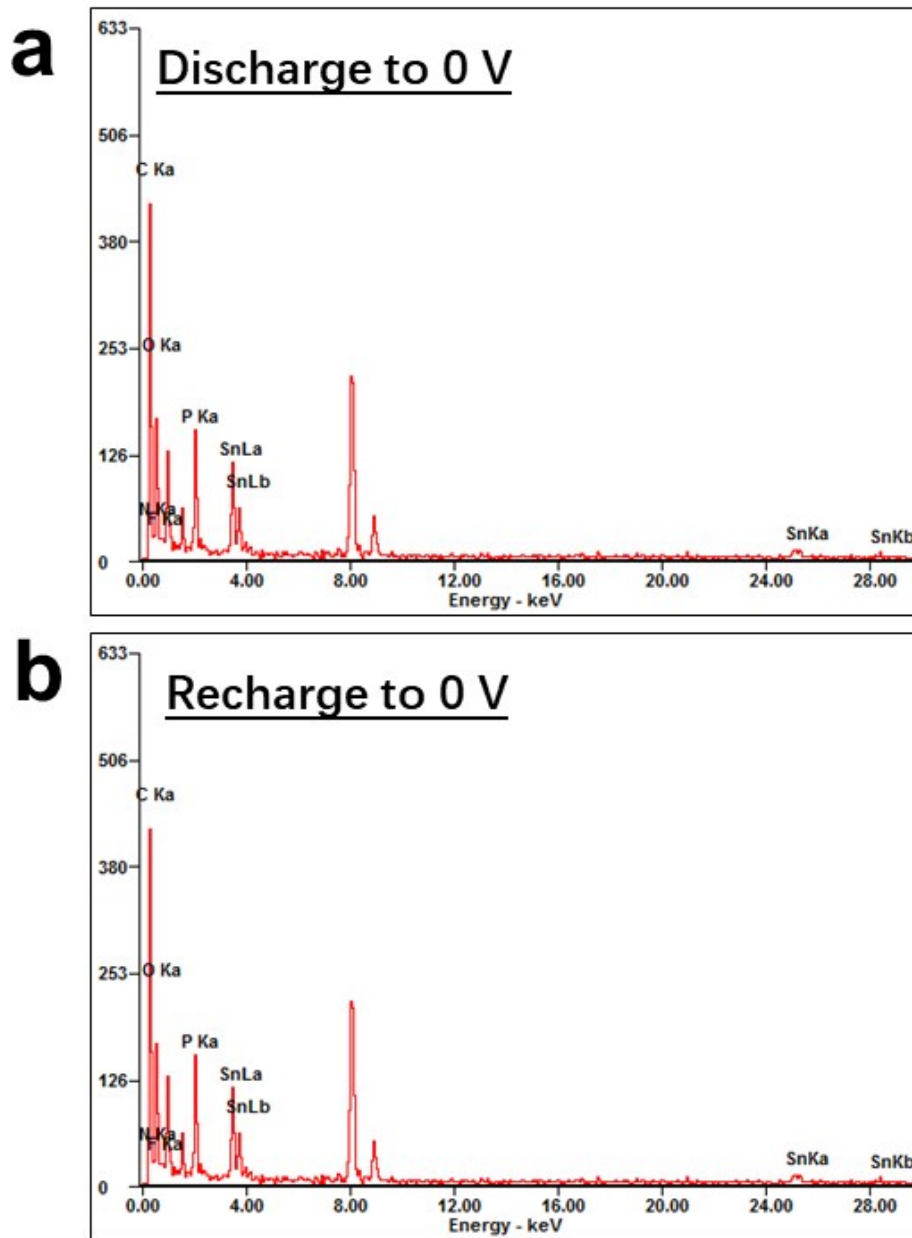

**Fig. S16** STEM-EDX spectrum of the P@Sn@CNT electrode during the 1<sup>st</sup> cycle: (a) discharged to 0 V and (b) recharged to 3 V.
